# Supplementary material for: Circadian Cycle-Dependent MeCP2 and Brain Chromatin Changes
Source: PubMed Central journal article supplement (PMC4395115; doi:10.1371/journal.pone.0123693), 2015-04-13

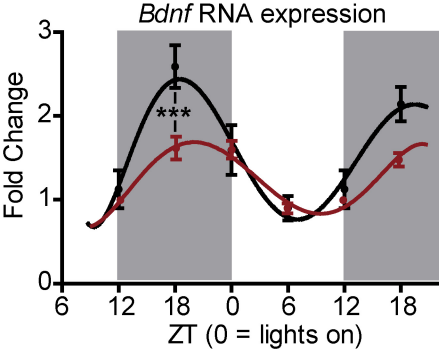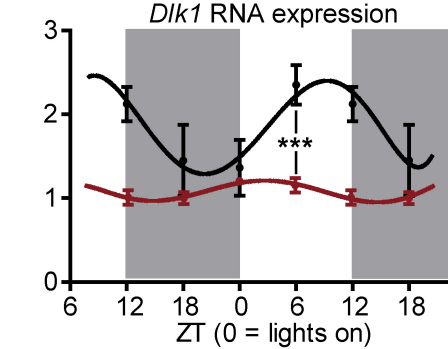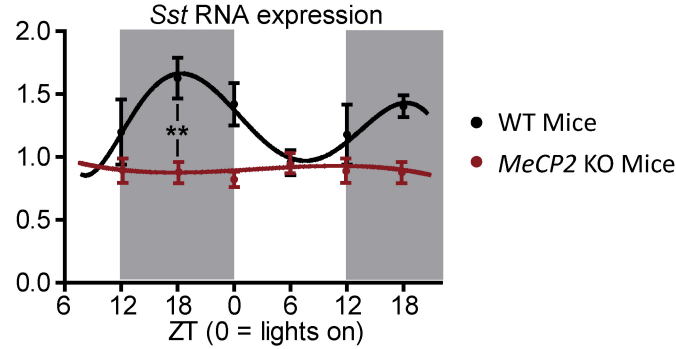

Supplement: pone.0123693.s002.pdf [file pone.0123693.s002.pdf]
